# Supplementary material for: Novel peroxosolvates of tetraalkylammonium halides: the first case of layers containing hydrogen-bonded peroxide molecules
Source: Royal Society of Chemistry journal article supplement (doi:10.1039/d1ce01476e), 2021-12-02
Supplement: d1ce01476e1.pdf [file d1ce01476e1.pdf]

## Novel peroxosolvates of tetraalkylammonium halides: first case of hydrogen bonded peroxide-containing layers.

Mger A. Navasardyan, Alexander G. Medvedev, Petr V. Prikhodchenko, Andrei V. Churakov\*

*Kurnakov Institute of General and Inorganic Chemistry, Russian Academy of Sciences, Leninskii prosp. 31, 119991 Moscow, Russia. E-mail: churakov@igic.ras.ru; Fax: +7 495 9541279*

Experimental data sets were collected on a Bruker SMART APEX II diffractometer (for **1**, **3** and **4**) and Bruker D8 Venture machine for **2** using graphite monochromatized Mo- $K\alpha$  radiation ( $\lambda = 0.71073 \text{ \AA}$ ). Absorption corrections based on measurements of equivalent reflections were applied.<sup>1</sup> The structures were solved by direct methods and refined by full matrix least-squares on  $F^2$  with anisotropic thermal parameters for all non-hydrogen atoms.<sup>2</sup> All hydrogen atoms were found from difference Fourier synthesis and refined with isotropic thermal parameters. In all structures, partial substitutional disorder of hydrogen peroxide by water molecules<sup>3-6</sup> was not observed since no residual peaks with an intensity more than  $0.17 \text{ e}\cdot\text{\AA}^{-3}$  were seen in the hydrogen peroxide molecule regions.

**Table S1.** Crystal data and details of X-ray analysis.

|                                                             | <b>1</b>                                                                     | <b>2</b>                                                                     | <b>3</b>                                                                     | <b>4</b>                                                                     |
|-------------------------------------------------------------|------------------------------------------------------------------------------|------------------------------------------------------------------------------|------------------------------------------------------------------------------|------------------------------------------------------------------------------|
| Empirical formula                                           | C <sub>8</sub> H <sub>24</sub> Cl <sub>1</sub> N <sub>1</sub> O <sub>4</sub> | C <sub>8</sub> H <sub>24</sub> Br <sub>1</sub> N <sub>1</sub> O <sub>4</sub> | C <sub>5</sub> H <sub>15</sub> Cl <sub>2</sub> N <sub>1</sub> O <sub>2</sub> | C <sub>9</sub> H <sub>16</sub> Cl <sub>1</sub> N <sub>1</sub> O <sub>2</sub> |
| <i>F</i> <sub>w</sub>                                       | 233.73                                                                       | 278.19                                                                       | 192.08                                                                       | 205.68                                                                       |
| colour, habit                                               | colourless, prism                                                            | colourless, prism                                                            | colourless, unshapen                                                         | colourless, prism                                                            |
| cryst size (mm)                                             | 0.30 × 0.20 × 0.10                                                           | 0.30 × 0.15 × 0.05                                                           | 0.40 × 0.30 × 0.25                                                           | 0.45 × 0.20 × 0.10                                                           |
| temperature (K)                                             | 150                                                                          | 150                                                                          | 150                                                                          | 120                                                                          |
| crystal system                                              | orthorhombic                                                                 | orthorhombic                                                                 | orthorhombic                                                                 | monoclinic                                                                   |
| space group                                                 | <i>Pna</i> 2 <sub>1</sub>                                                    | <i>Pna</i> 2 <sub>1</sub>                                                    | <i>P</i> 2 <sub>1</sub> 2 <sub>1</sub> 2 <sub>1</sub>                        | <i>P</i> 2 <sub>1</sub> / <i>c</i>                                           |
| <i>a</i> (Å)                                                | 11.8741(5)                                                                   | 12.0887(6)                                                                   | 7.5628(2)                                                                    | 7.2420(3)                                                                    |
| <i>b</i> (Å)                                                | 8.4164(3)                                                                    | 8.5504(5)                                                                    | 9.9033(3)                                                                    | 10.0690(4)                                                                   |
| <i>c</i> (Å)                                                | 12.6736(6)                                                                   | 12.7308(7)                                                                   | 25.3929(7)                                                                   | 14.7992(6)                                                                   |
| $\beta$ (deg)                                               | 90                                                                           | 90                                                                           | 90                                                                           | 100.379(2)                                                                   |
| <i>V</i> (Å <sup>3</sup> )                                  | 1266.56(9)                                                                   | 1315.90(12)                                                                  | 1901.84(9)                                                                   | 1061.50(7)                                                                   |
| <i>Z</i>                                                    | 4                                                                            | 4                                                                            | 8                                                                            | 4                                                                            |
| <i>D</i> <sub>c</sub> (g·cm <sup>-3</sup> )                 | 1.226                                                                        | 1.404                                                                        | 1.342                                                                        | 1.287                                                                        |
| $\mu$ (mm <sup>-1</sup> )                                   | 0.295                                                                        | 3.118                                                                        | 0.634                                                                        | 0.330                                                                        |
| <i>F</i> (000)                                              | 512                                                                          | 584                                                                          | 816                                                                          | 440                                                                          |
| $\theta$ range (deg)                                        | 2.91 to 28.98                                                                | 2.87 to 29.00                                                                | 2.21 to 29.99                                                                | 2.46 to 26.99                                                                |
| refl collcd                                                 | 14169                                                                        | 22397                                                                        | 35364                                                                        | 10629                                                                        |
| indep reflns / <i>R</i> <sub>int</sub>                      | 3342 / 0.0328                                                                | 3496 / 0.0398                                                                | 5462 / 0.0188                                                                | 2287 / 0.0200                                                                |
| reflns <i>I</i> > 2 $\sigma$ ( <i>I</i> )                   | 3271                                                                         | 3324                                                                         | 5422                                                                         | 2080                                                                         |
| No of param                                                 | 223                                                                          | 224                                                                          | 302                                                                          | 182                                                                          |
| Goof on <i>F</i> <sup>2</sup>                               | 1.041                                                                        | 1.023                                                                        | 1.063                                                                        | 1.045                                                                        |
| <i>R</i> <sub>1</sub> ( <i>I</i> > 2 $\sigma$ ( <i>I</i> )) | 0.0359                                                                       | 0.0198                                                                       | 0.0187                                                                       | 0.0270                                                                       |
| <i>wR</i> <sub>2</sub> (all data)                           | 0.1013                                                                       | 0.0429                                                                       | 0.0493                                                                       | 0.0735                                                                       |
| Flack parameter                                             | 0.09(5)                                                                      | 0.184(9)                                                                     | 0.01(3)                                                                      | —                                                                            |
| largest diff peak / hole (e·Å <sup>-3</sup> )               | 0.263 / -0.156                                                               | 0.277 / -0.283                                                               | 0.304 / -0.232                                                               | 0.288 / -0.188                                                               |

1. G. M. Sheldrick, SADABS. *Program for scaling and correction of area detector data*, University of Göttingen, Germany, 1997.
2. G. M. Sheldrick, *Acta Crystallogr., Sect. A: Found. Crystallogr.*, 2008, **64**, 112.
3. B. F. Pedersen, *Acta Crystallogr., Sect. B: Struct. Crystallogr. Cryst. Chem.*, 1972, **28**, 746.
4. B. F. Pedersen, *Acta Crystallogr., Sect. B: Struct. Crystallogr. Cryst. Chem.*, 1972, **28**, 1014.

5. G. Laus, V. Kahlenberg, K. Wurst, T. Lörting and H. Schottenberger, *CrystEngComm*, 2008, **10**, 1638.  
6. A. V. Churakov, P. V. Prihodchenko and J. A. K. Howard, *CrystEngComm*, 2005, **7**, 664.

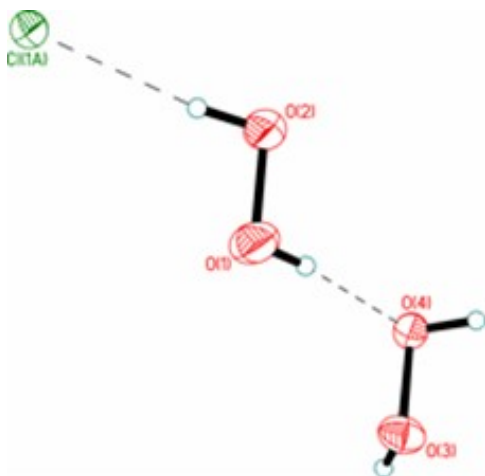

**Fig. S1** H-bonds formed by H1–O1–O2–H2 molecule in the structure **1**. Symmetry operation: (A)  $x, -1+y, z$ .

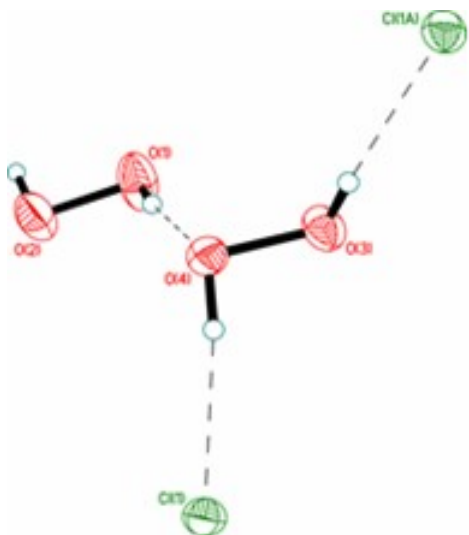

**Fig. S2** H-bonds formed by H3–O3–O4–H4 molecule in the structure **1**. Symmetry operation: (A)  $0.5-x, 1.5+y, 0.5+z$ .
